# Supplementary material
Source: publisher figshare collection journal article supplement (https://adisjournals.figshare.com/ndownloader/files/31424863)

# White Paper on the Value of Time Savings for Patients and Healthcare Providers of Breast Cancer Therapy: The Fixed-Dose Combination of Pertuzumab and Trastuzumab for Subcutaneous Injection as an Example

Christian Jackisch · Federico Manevy · Suzanne Frank · Nicki Roberts · Jason Shafrin

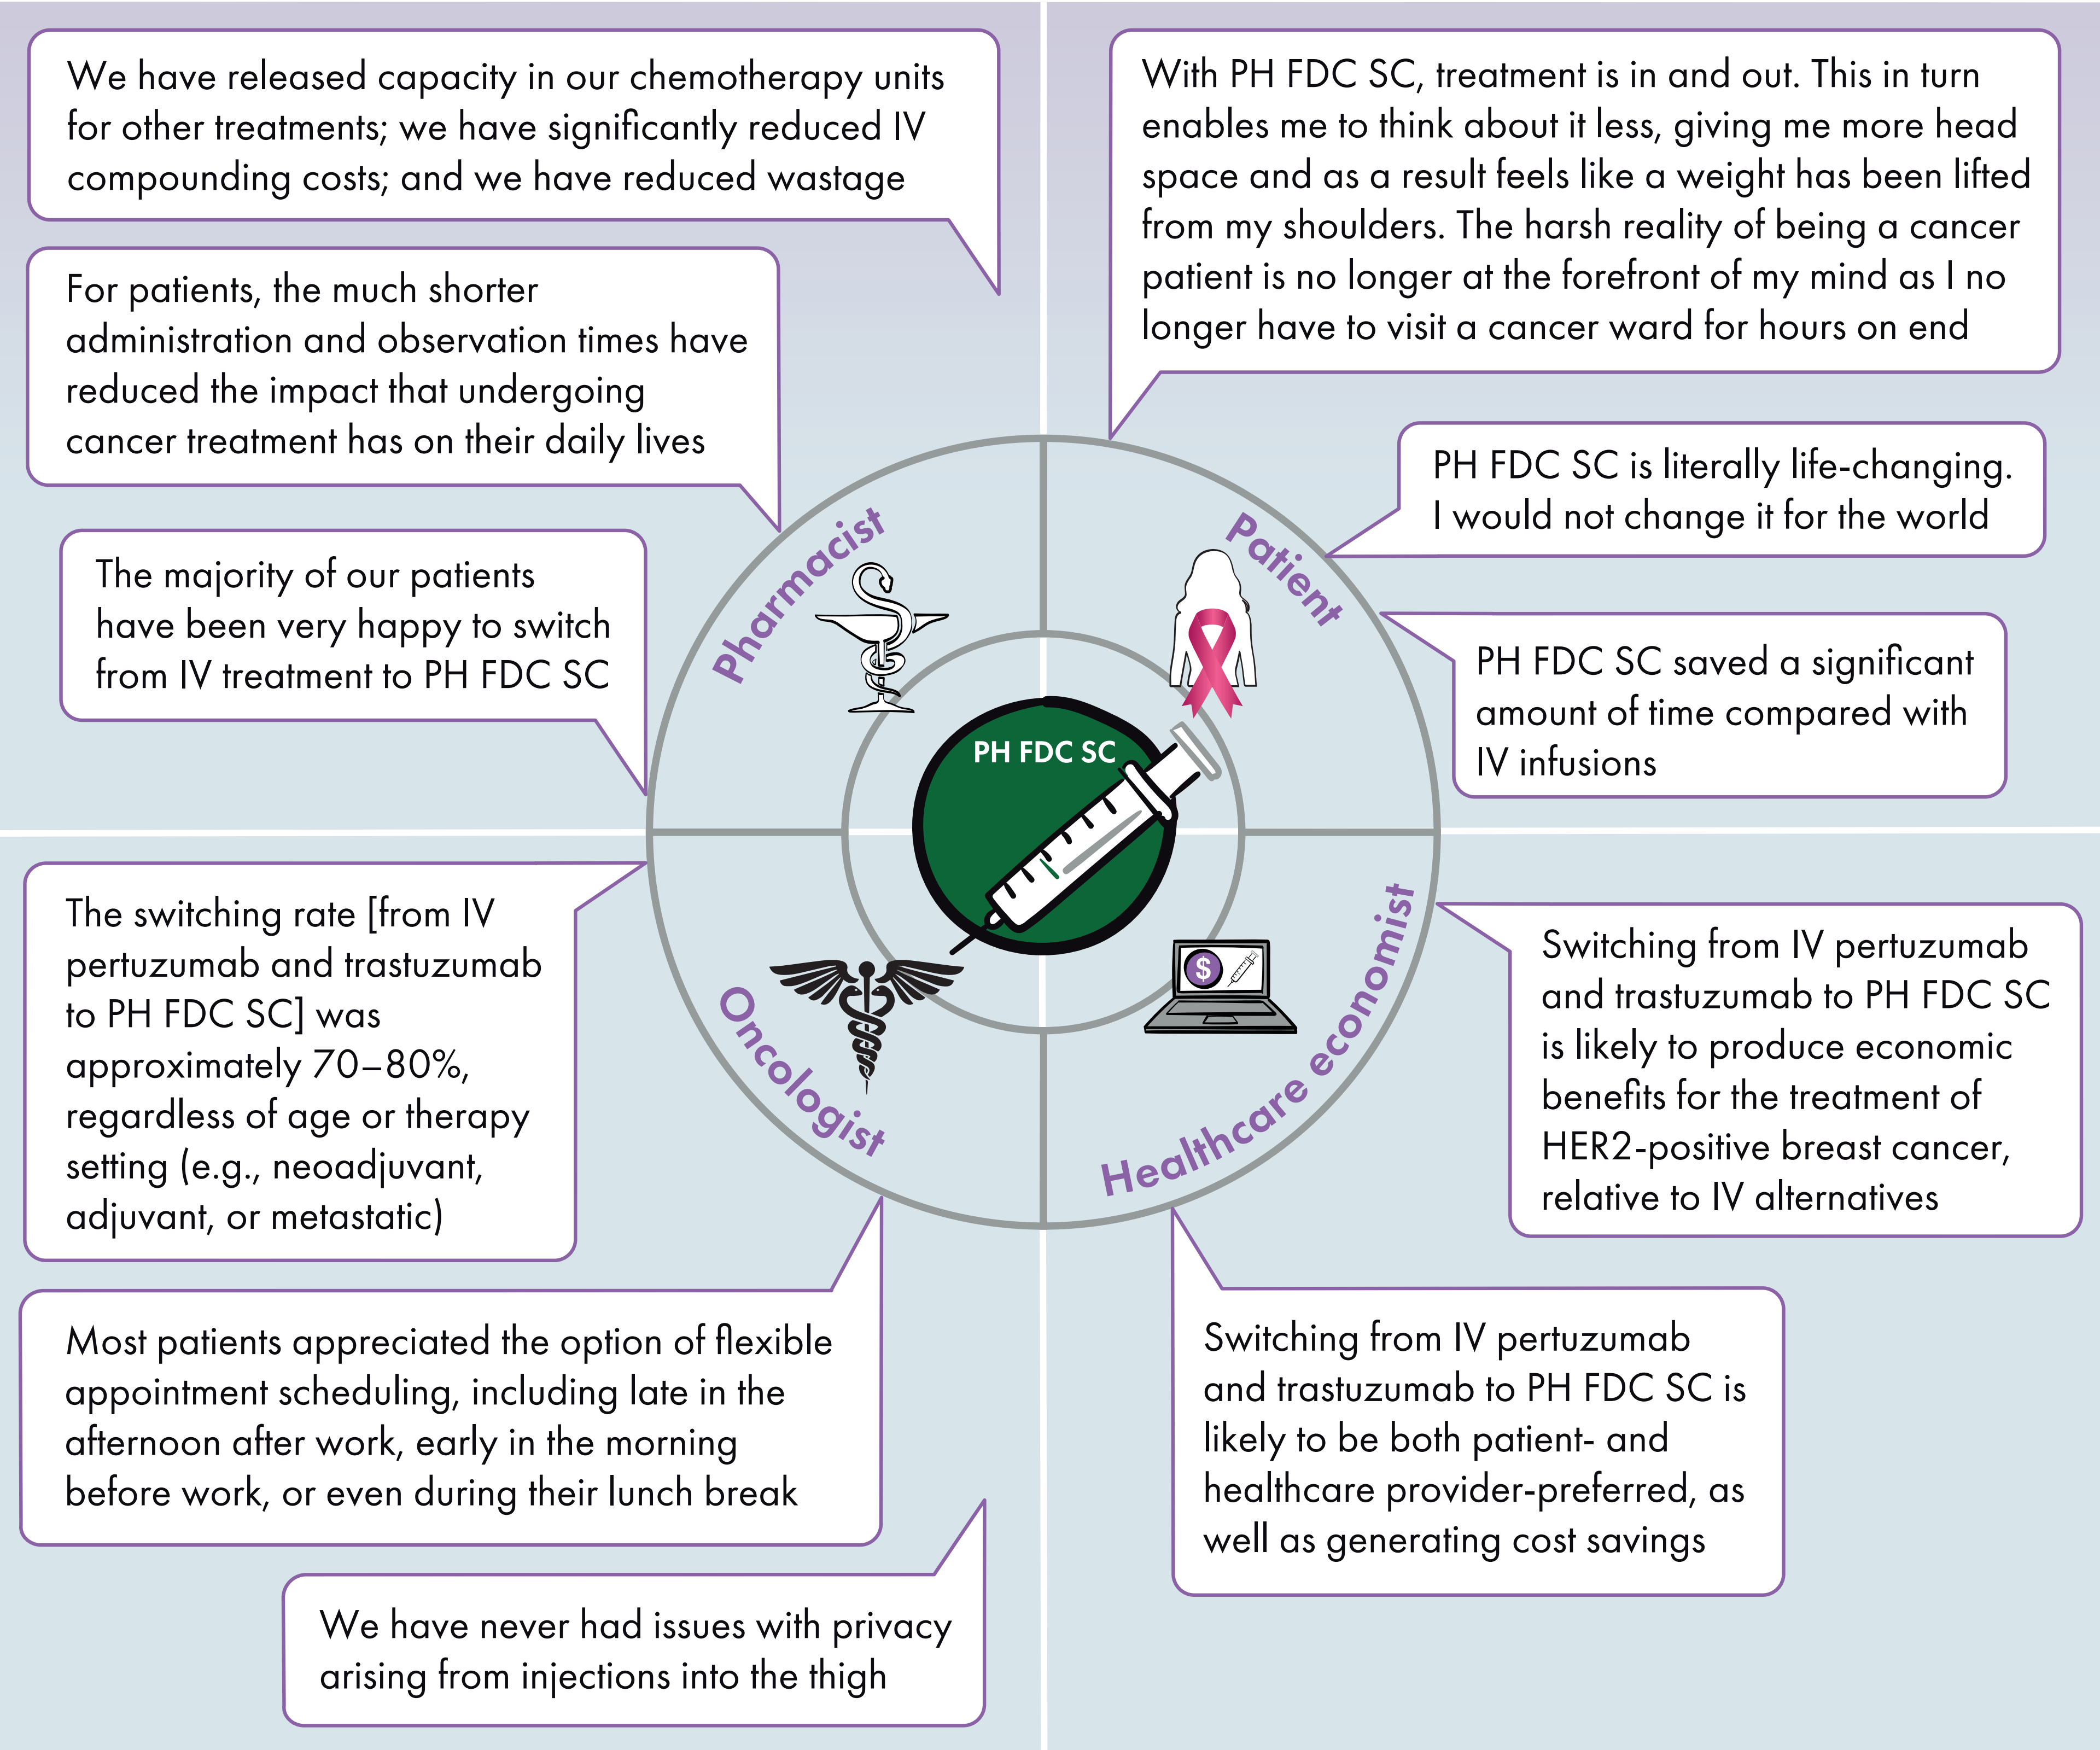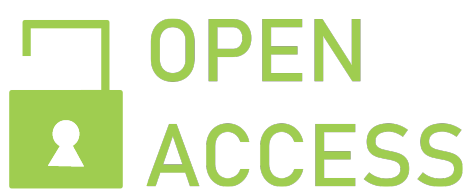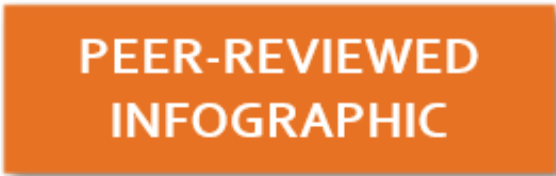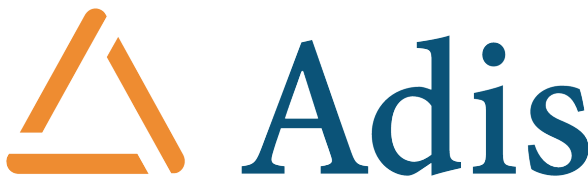

Supplement: Supplementary file 1 [file 31424863]
